# Supplementary material
Source: Springer Nature journal article supplement (https://www.springermedizin.de/resource/supplementary/13000_2013_1100_MOESM1_ESM.pdf/9625764)

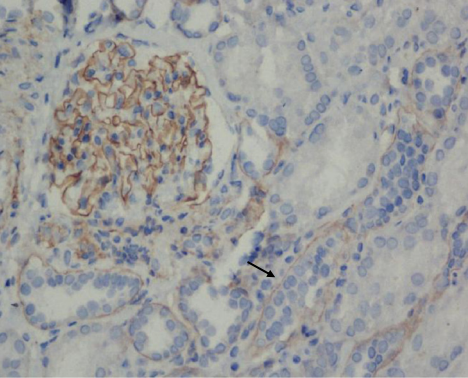

**a**

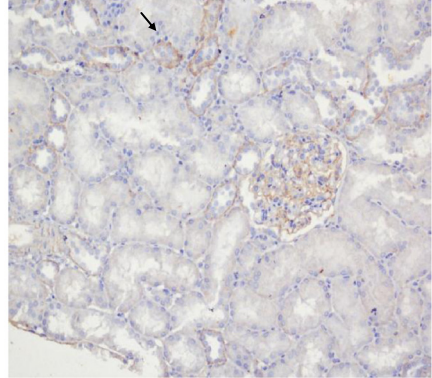

**b**

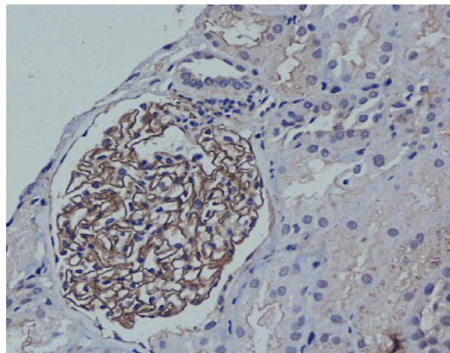

**c**

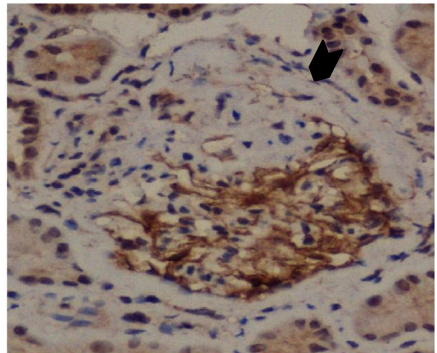

**d**

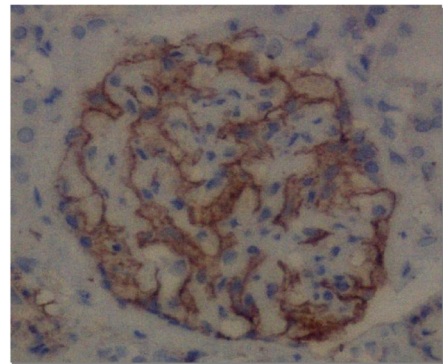

**e**

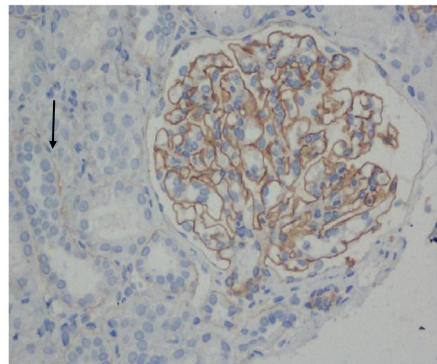

**f**

Supplement: MOESM1 [file 9625764]
